# Supplementary material for: Cadaverine, a metabolite of the microbiome, reduces breast cancer aggressiveness through trace amino acid receptors
Source: PubMed Central journal article supplement (PMC6361949; doi:10.1038/s41598-018-37664-7), 2019-02-04

**Supplementary figure 1 for Kovács et al. “Cadaverine, a metabolite of the microbiome, reduces breast cancer aggressiveness through trace amino acid receptors”**

Tünde Kovács<sup>1</sup>, Edit Mikó<sup>1,5</sup>, András Vida<sup>1,5</sup>, Éva Sebő<sup>6</sup>, Judit Toth<sup>3</sup>, Tamás Csonka<sup>4</sup>, Anita Boratkó<sup>1</sup>, Gyula Ujlaki<sup>1</sup>, Gréta Lente<sup>1</sup>, Patrik Kovács<sup>1</sup>, Dezső Tóth<sup>3</sup>, Péter Árkosy<sup>3</sup>, Borbála Kiss<sup>2</sup>, Gábor Méhes<sup>4</sup>, James J. Goedert<sup>7</sup>, Péter Bai<sup>1,5,8,\*</sup>

Departments of <sup>1</sup>Medical Chemistry, <sup>2</sup>Dermatology, <sup>3</sup>Oncology and <sup>4</sup>Pathology Faculty of Medicine, University of Debrecen, 4032, Hungary;

<sup>5</sup>MTA-DE Lendület Laboratory of Cellular Metabolism, Debrecen, 4032, Hungary;

<sup>6</sup>Kenézy Breast Center, Kenézy Gyula County Hospital, Debrecen, 4032, Hungary;

<sup>7</sup>National Cancer Institute, National Institutes of Health, Bethesda, 20982 MD, USA

<sup>8</sup>Research Center for Molecular Medicine, Faculty of Medicine, University of Debrecen, 4032, Hungary;

Running title: Cadaverine production modulates breast cancer

\*Whom correspondence should be sent to:

Peter Bai, PhD, DSc University of Debrecen, Department of Medical Chemistry, 4032 Debrecen, Egyetem tér 1., Hungary, Tel. +36 52 412 345; Fax. +36 52 412 566, e-mail: [baip@med.unideb.hu](mailto:baip@med.unideb.hu)

A

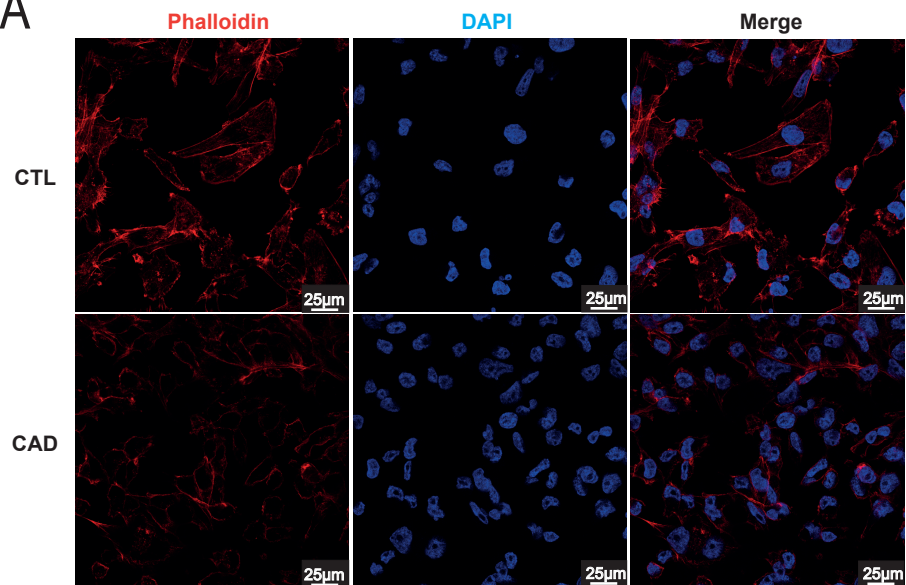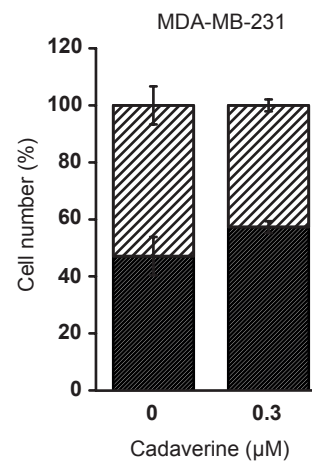

mesenchymal  
epithelial

D

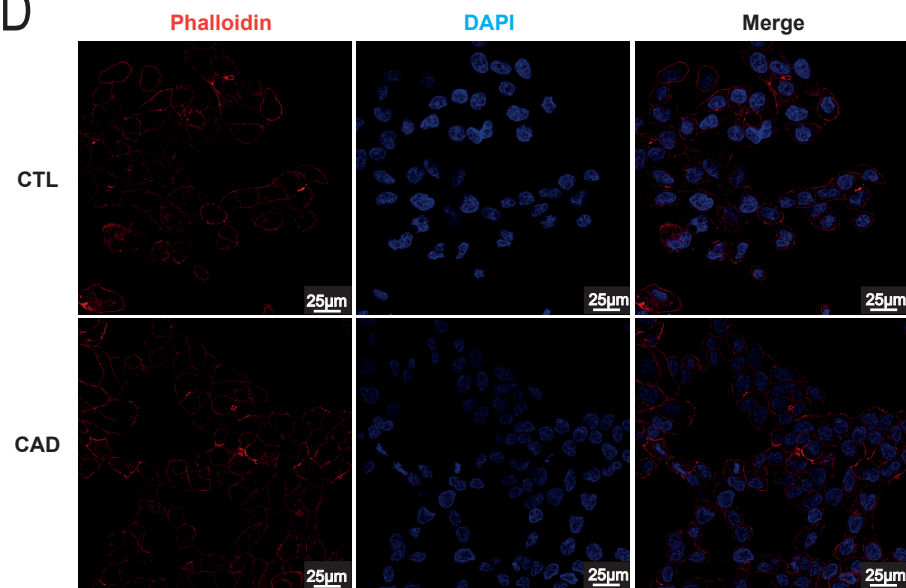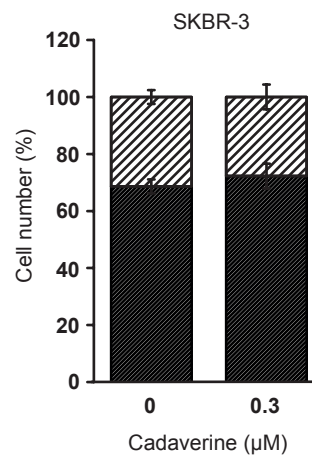

B

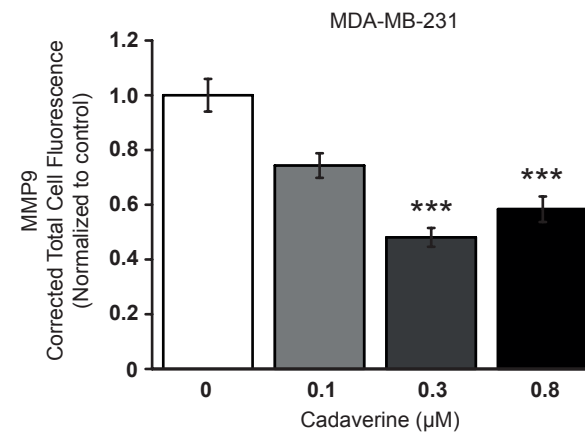

C

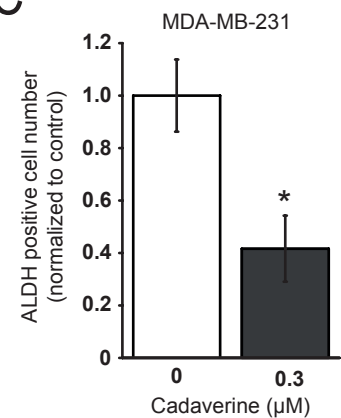

E

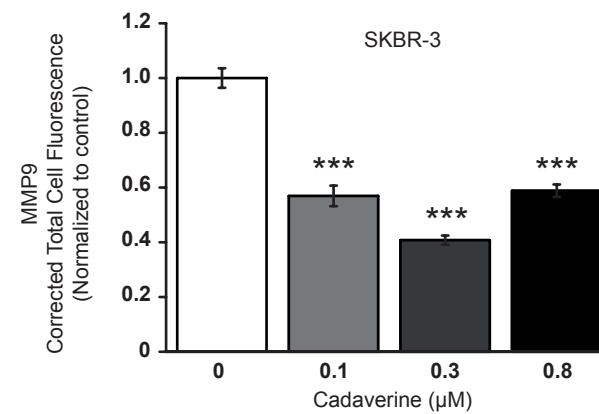

Supplement: 41598_2018_37664_MOESM1_ESM.pdf [file 41598_2018_37664_MOESM1_ESM.pdf]
